# Supplementary material for: Gut Symbionts Lactobacillus reuteri R2lc and 2010 Encode a Polyketide Synthase Cluster That Activates the Mammalian Aryl Hydrocarbon Receptor
Source: PubMed Central journal article supplement (PMC6498181; doi:10.1128/aem.01661-18), 2019-05-02
Supplement: AEM.01661-18-s0001.pdf [file AEM.01661-18-s0001.pdf]

1 **SUPPLEMENTARY MATERIAL**

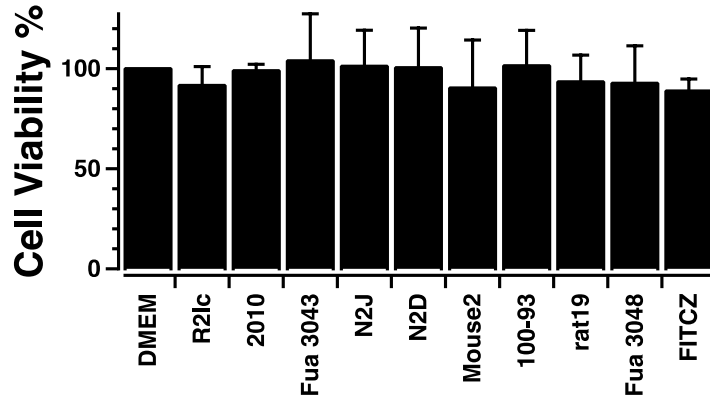

2

3 **Figure S1:** The cell-free bacterial supernatants had no effect on cell viability. Cell  
 4 viability assay was performed for nine *L. reuteri* strains. Data shown represent averages  
 5 of three biological replicates and error bars represent standard deviation.

6

7 **Table S1.** Oligonucleotides used for pVP-R2lc02 gap closure.

| Oligonucleotide | Sequence (5'-3')         |
|-----------------|--------------------------|
| oVPL2319        | aagcaccctggaactattg      |
| oVPL2320        | acacctgcaacactttggaag    |
| oVPL2321        | atcgtggagaaatagctgttcg   |
| oVPL2322        | agttggcaccctaaatgtg      |
| oVPL2323        | ttgcgcaattgctgaccttg     |
| oVPL2324        | tggacctgatcttaacctcc     |
| oVPL2325        | aggcccgttcttgcgtttg      |
| oVPL2326        | accgaatgtaggtggaacatc    |
| oVPL2327        | tcattcaccacggatgagatg    |
| oVPL2328        | aagtgccgatttagtagctacg   |
| oVPL2329        | tcaatatcccaaggcttcag     |
| oVPL2330        | ttatgagccgtttgctctgac    |
| oVPL2331        | tcctctggtgtcctagcc       |
| oVPL2332        | agagaattgcagaaagtgggtgac |
| oVPL2333        | tcactagccaatcggggtg      |
| oVPL2344        | tgggtggaccaattattac      |
| oVPL2345        | taatgatcgttcagggtgagg    |
| oVPL2346        | ttctcgtgaaccatcctctc     |
| oVPL2347        | tgcaagttagatagtgggatcg   |
| oVPL2348        | tgccttagcattgatgtgc      |
| oVPL2373        | acccaactccgtctcttctg     |
| oVPL2374        | aagtgcggctcctaatgattg    |
| oVPL2375        | catgtggaattgctggaactta   |
| oVPL2376        | accattcagcgaacttaggtc    |
| oVPL2377        | taagggcgtaaatcgtcaag     |
| oVPL2378        | agctttatcacttgcaacgcc    |
| oVPL2379        | atggaacgcctttgtagtc      |

|          |                         |
|----------|-------------------------|
| oVPL2380 | tctgcaaaggactcaccacag   |
| oVPL2381 | atgatcaggccaacgatacg    |
| oVPL2382 | tatcccgcgagcaagtaaag    |
| oVPL2383 | agcctattgccaatgtggc     |
| oVPL2384 | tatctgggattatagggcgtg   |
| oVPL2385 | aggtttagctgctgctctgg    |
| oVPL2386 | agtccggcaatcaacctctg    |
| oVPL2387 | aattaccggctctgccattc    |
| oVPL2388 | tgggatgggattattgcagg    |
| oVPL2389 | atcaatcagcaggcaatagcc   |
| oVPL2390 | taattgcatacccgcttgaattg |

---

oVPL: van Pijkeren Lab oligonucleotide

identification number.

8

9

10 **Table S2.** 79 unique genes in R2lc that are not present in other *L. reuteri* strains.

| Number | Gene ID    | Gene Name                                    | Length (aa) | Located in |
|--------|------------|----------------------------------------------|-------------|------------|
| 1      | 2717889378 | hypothetical protein                         | 106         | pVP-R2lc01 |
| 2      | 2717889379 | hypothetical protein                         | 219         | pVP-R2lc01 |
|        |            | Relaxase/Mobilisation nuclease domain-       | 461         | pVP-R2lc01 |
| 3      | 2717889380 | containing protein                           |             |            |
| 4      | 2717889381 | mobilisation protein (MobC)                  | 124         | pVP-R2lc01 |
| 5      | 2717889382 | hypothetical protein                         | 78          | pVP-R2lc01 |
| 6      | 2717889384 | putative transcriptional regulator           | 100         | pVP-R2lc01 |
|        | 2717889385 | RelE toxin of RelE / RelB toxin-antitoxin    | 129         | pVP-R2lc01 |
| 7      |            | system                                       |             |            |
| 8      | 2717889386 | hypothetical protein                         | 122         | pVP-R2lc01 |
|        | 2717889390 | Beta-ketoacyl synthase, N-terminal           | 798         | pVP-R2lc01 |
| 9      |            | domain                                       |             |            |
| 10     | 2717889391 | glycine C-acetyltransferase                  | 399         | pVP-R2lc01 |
| 11     | 2717889392 | acyl carrier protein                         | 663         | pVP-R2lc01 |
|        | 2717889393 | NAD(P)-dependent dehydrogenase, short-       | 847         | pVP-R2lc01 |
| 12     |            | chain alcohol dehydrogenase family           |             |            |
| 13     | 2717889394 | Phosphopantetheinyl transferase              | 228         | pVP-R2lc01 |
| 14     | 2717889395 | transcriptional regulator, TetR family       | 203         | pVP-R2lc01 |
|        |            | acetyl-CoA carboxylase biotin carboxyl       | 135         | pVP-R2lc01 |
| 15     | 2717889396 | carrier protein                              |             |            |
| 16     | 2717889575 | 3-oxoacyl-[acyl-carrier-protein] synthase II | 698         | pVP-R2lc02 |
| 17     | 2717889576 | acyl carrier protein                         | 90          | pVP-R2lc02 |
| 18     | 2717889578 | hypothetical protein                         | 109         | pVP-R2lc02 |
| 19     | 2717889580 | Glyoxylase, beta-lactamase superfamily II    | 298         | pVP-R2lc02 |
|        | 2717889581 | 4'-phosphopantetheinyl transferase           | 178         | pVP-R2lc02 |
| 20     |            | superfamily protein                          |             |            |
| 21     | 2717889592 | hypothetical protein                         | 95          | pVP-R2lc02 |
| 22     | 2717889593 | hypothetical protein                         | 230         | pVP-R2lc02 |
|        | 2717889594 | Relaxase/Mobilisation nuclease domain-       | 470         | pVP-R2lc02 |
| 23     |            | containing protein                           |             |            |
| 24     | 2717889595 | mobilisation protein (MobC)                  | 124         | pVP-R2lc02 |
| 25     | 2717889596 | hypothetical protein                         | 78          | pVP-R2lc02 |
| 26     | 2717889597 | hypothetical protein                         | 152         | pVP-R2lc02 |
| 27     | 2717889696 | hypothetical protein                         | 114         | NA         |
| 28     | 2717889703 | hypothetical protein                         | 90          | NA         |
| 29     | 2717889712 | tape measure domain-containing protein       | 766         | NA         |
| 30     | 2717889713 | hypothetical protein                         | 34          | NA         |

|    |            |                                                                        |      |    |
|----|------------|------------------------------------------------------------------------|------|----|
| 31 | 2717889746 | Glyoxylase, beta-lactamase superfamily II                              | 198  | NA |
| 32 | 2717889842 | hypothetical protein                                                   | 552  | NA |
| 33 | 2717889976 | hypothetical protein                                                   | 55   | NA |
| 34 | 2717890024 | hypothetical protein                                                   | 27   | NA |
| 35 | 2717890089 | hypothetical protein                                                   | 372  | NA |
| 36 | 2717890101 | hypothetical protein                                                   | 80   | NA |
| 37 | 2717890227 | hypothetical protein                                                   | 29   | NA |
| 38 | 2717890265 | hypothetical protein                                                   | 94   | NA |
| 39 | 2717890708 | hypothetical protein                                                   | 30   | NA |
| 40 | 2717890818 | hypothetical protein                                                   | 53   | NA |
|    | 2717890832 | Membrane protein involved in the export of O-antigen and teichoic acid | 467  | NA |
| 41 |            |                                                                        |      |    |
| 42 | 2717890835 | hypothetical protein                                                   | 377  | NA |
| 43 | 2717890838 | Predicted hydrolase, HAD superfamily                                   | 655  | NA |
|    | 2717890839 | UDP-N-acetylglucosamine transferase subunit ALG13                      | 165  | NA |
| 44 |            |                                                                        |      |    |
|    | 2717890840 | Oligosaccharide biosynthesis protein Alg14 like                        | 149  | NA |
| 45 |            |                                                                        |      |    |
| 46 | 2717891063 | hypothetical protein                                                   | 86   | NA |
| 47 | 2717891073 | prevent-host-death family protein                                      | 86   | NA |
|    | 2717891074 | toxin-antitoxin system, toxin component, Txe/YoeB family               | 86   | NA |
| 48 |            |                                                                        |      |    |
| 49 | 2717891075 | hypothetical protein                                                   | 1147 | NA |
| 50 | 2717891076 | hypothetical protein                                                   | 298  | NA |
| 51 | 2717891078 | Helix-turn-helix                                                       | 211  | NA |
| 52 | 2717891287 | hypothetical protein                                                   | 576  | NA |
| 53 | 2717891289 | hypothetical protein drug resistance transporter, EmrB/QacA subfamily  | 589  | NA |
| 54 | 2717891361 |                                                                        |      |    |
| 55 | 2717891362 | transcriptional regulator, TetR family                                 | 177  | NA |
| 56 | 2717891397 | hypothetical protein                                                   | 127  | NA |
| 57 | 2717891398 | hypothetical protein                                                   | 43   | NA |
| 58 | 2717891402 | Helix-turn-helix                                                       | 71   | NA |
| 59 | 2717891403 | hypothetical protein                                                   | 219  | NA |
| 60 | 2717891404 | hypothetical protein                                                   | 121  | NA |
| 61 | 2717891406 | hypothetical protein                                                   | 50   | NA |
| 62 | 2717891407 | hypothetical protein                                                   | 91   | NA |
| 63 | 2717891417 | hypothetical protein                                                   | 154  | NA |
| 64 | 2717891418 | hypothetical protein                                                   | 165  | NA |
| 65 | 2717891421 | hypothetical protein                                                   | 125  | NA |
| 66 | 2717891422 | Methyltransferase domain-containing                                    | 144  | NA |

|    |            |                                            |     |    |
|----|------------|--------------------------------------------|-----|----|
|    |            | protein                                    |     |    |
| 67 | 2717891423 | hypothetical protein                       | 47  | NA |
| 68 | 2717891424 | hypothetical protein                       | 73  | NA |
| 69 | 2717891426 | Helix-turn-helix                           | 143 | NA |
| 70 | 2717891427 | hypothetical protein                       | 44  | NA |
| 71 | 2717891428 | hypothetical protein                       | 35  | NA |
| 72 | 2717891430 | hypothetical protein                       | 120 | NA |
| 73 | 2717891435 | hypothetical protein                       | 248 | NA |
| 74 | 2717891466 | hypothetical protein                       | 86  | NA |
| 75 | 2717891467 | hypothetical protein                       | 142 | NA |
|    | 2717891469 | Homeodomain-like domain-containing protein | 65  | NA |
| 76 |            |                                            |     |    |
| 77 | 2717891480 | protein of unknown function (DUF3883)      | 261 | NA |
| 78 | 2717891486 | hypothetical protein                       | 182 | NA |
|    | 2717891487 | Nuclease-related domain-containing protein | 636 | NA |
| 79 |            |                                            |     |    |

---

11

12

13 **Table S3.** Homologous genes to *pks* cluster. Amino acid sequences of individual genes  
 14 in the *pks* cluster were searched in NCBI swissport database.

15

| <b>R2lc protein</b> | <b>Similar protein in NCBI database</b>                                    | <b>Organism</b>                                         | <b>aa identity %</b> | <b>Accession Number</b> |
|---------------------|----------------------------------------------------------------------------|---------------------------------------------------------|----------------------|-------------------------|
| <i>pksA</i>         | Methylenomycin A resistance protein                                        | <i>Bacillus subtilis</i> subsp. subtilis str. 168       | 32                   | Q00538.1                |
| <i>pksB</i>         | Beta-ketoacyl-ACP synthase II                                              | <i>Vibrio cholerae</i> O1 biovar El Tor str. N16961     | 30                   | Q9KQH9.3                |
| <i>pksC</i>         | Phosphodeoxyribomutase                                                     | <i>Streptococcus pyogenes</i> serotype M1               | 38                   | P63927.1                |
| <i>pksD</i>         | FabG                                                                       | <i>Thermotoga maritima</i> MSB8                         | 36                   | Q9X248.1                |
| <i>pksE</i>         | Hypothetical protein                                                       | -                                                       | -                    | -                       |
| <i>pksF</i>         | FabZ                                                                       | <i>Oceanobacillus iheyensis</i> HTE831                  | 40                   | Q8EMB1.1                |
| <i>pksG</i>         | Probable metallo-hydrolase YgjP                                            | <i>Bacillus subtilis</i> subsp. subtilis str. 168       | 27                   | P54553.1                |
| <i>pksH</i>         | 4'-phosphopantetheinyl transferase                                         | <i>Pasteurella multocida</i> subsp. multocida str. Pm70 | 33                   | Q9CPD1.1                |
| <i>pksI</i>         | Negative transcription regulator PadR                                      | <i>Bacillus subtilis</i> subsp. subtilis str. 168       | 32                   | P94443.1                |
| <i>pksJ</i>         | Polyketide biosynthesis malonyl CoA-acyl carrier protein transacylase BaeC | <i>Bacillus velezensis</i> FZB42                        | 33                   | A7Z4X8.1                |
| <i>pksK</i>         | Biotin carboxyl carrier protein of acetyl-CoA carboxylase                  | <i>Pseudomonas aeruginosa</i> PAO1                      | 34                   | P37799.1                |
| <i>pksL</i>         | Biotin carboxylase 1;                                                      | <i>Bacillus subtilis</i> subsp. subtilis str. 168       | 53                   | P49787.3                |
| <i>pksM</i>         | Acetyl-coenzyme A carboxylase carboxyl transferase subunit beta            | <i>Lactobacillus reuteri</i> JCM 1112                   | 63                   | B2G7K3.1                |
| <i>pksN</i>         | Acetyl-coenzyme A carboxylase carboxyl transferase subunit alpha           | <i>Enterococcus faecalis</i> V583                       | 51                   | Q830B5.1                |
| <i>pksO</i>         | Bifunctional ligase/repressor BirA                                         | <i>Bacillus subtilis</i> subsp. subtilis str. 168       | 29                   | P0CI75.1                |

16

17

18 **Table S4.** *Lactococcus lactis subsp. cremoris* KW10 encodes a homologue gene cluster  
 19 to the *pks* cluster in R2lc and 2010. Amino acid sequences of individual genes in the  
 20 *pks* cluster were searched in KW10 genome.

21

| Gene        | Homologous gene in KW10                                                      | aa identity% | Gene ID    |
|-------------|------------------------------------------------------------------------------|--------------|------------|
| <i>pksA</i> | MFS transporter                                                              | 53           | 2744054433 |
| <i>pksB</i> | 3-oxoacyl-[acyl-carrier-protein] synthase II                                 | 46           | 2744190884 |
| <i>pksC</i> | acyl carrier protein                                                         | 63           | 2744190885 |
| <i>pksD</i> | 3-oxoacyl-[acyl-carrier protein] reductase                                   | 37           | 2744190886 |
| <i>pksE</i> | Hypothetical protein                                                         | 36           | 2744190887 |
| <i>pksF</i> | 3-hydroxyacyl-[acyl-carrier-protein] dehydratase                             | 46           | 2744190888 |
| <i>pksG</i> | glyoxylase-like metal-dependent hydrolase (beta-lactamase superfamily II)    | 33           | 2744190889 |
| <i>pksH</i> | 4'-phosphopantetheinyl transferase superfamily protein                       | 31           | 2744190890 |
| <i>pksI</i> | PadR family transcriptional regulator                                        | 51           | 2744190891 |
| <i>pksJ</i> | [acyl-carrier-protein] S-malonyltransferase                                  | 35           | 2744191699 |
| <i>pksK</i> | biotin carboxyl carrier protein                                              | 29           | 2744191696 |
| <i>pksL</i> | biotin carboxylase /acetyl-CoA carboxylase carboxyltransferase subunit alpha | 54           | 2744191694 |
| <i>pksM</i> | acetyl-CoA carboxylase carboxyltransferase subunit alpha                     | 53           | 2744191693 |
| <i>pksN</i> | acetyl-CoA carboxylase carboxyltransferase subunit alpha                     | 59           | 2744191692 |
| <i>pksO</i> | BirA family biotin operon repressor/biotin-[acetyl-CoA-carboxylase] ligase   | 41           | 2744192508 |

22
